# Supplementary material
Source: publisher figshare collection journal article supplement (https://springernature.figshare.com/ndownloader/files/27609242)

# Biological process level 2 GO annotation of 0600 EST library

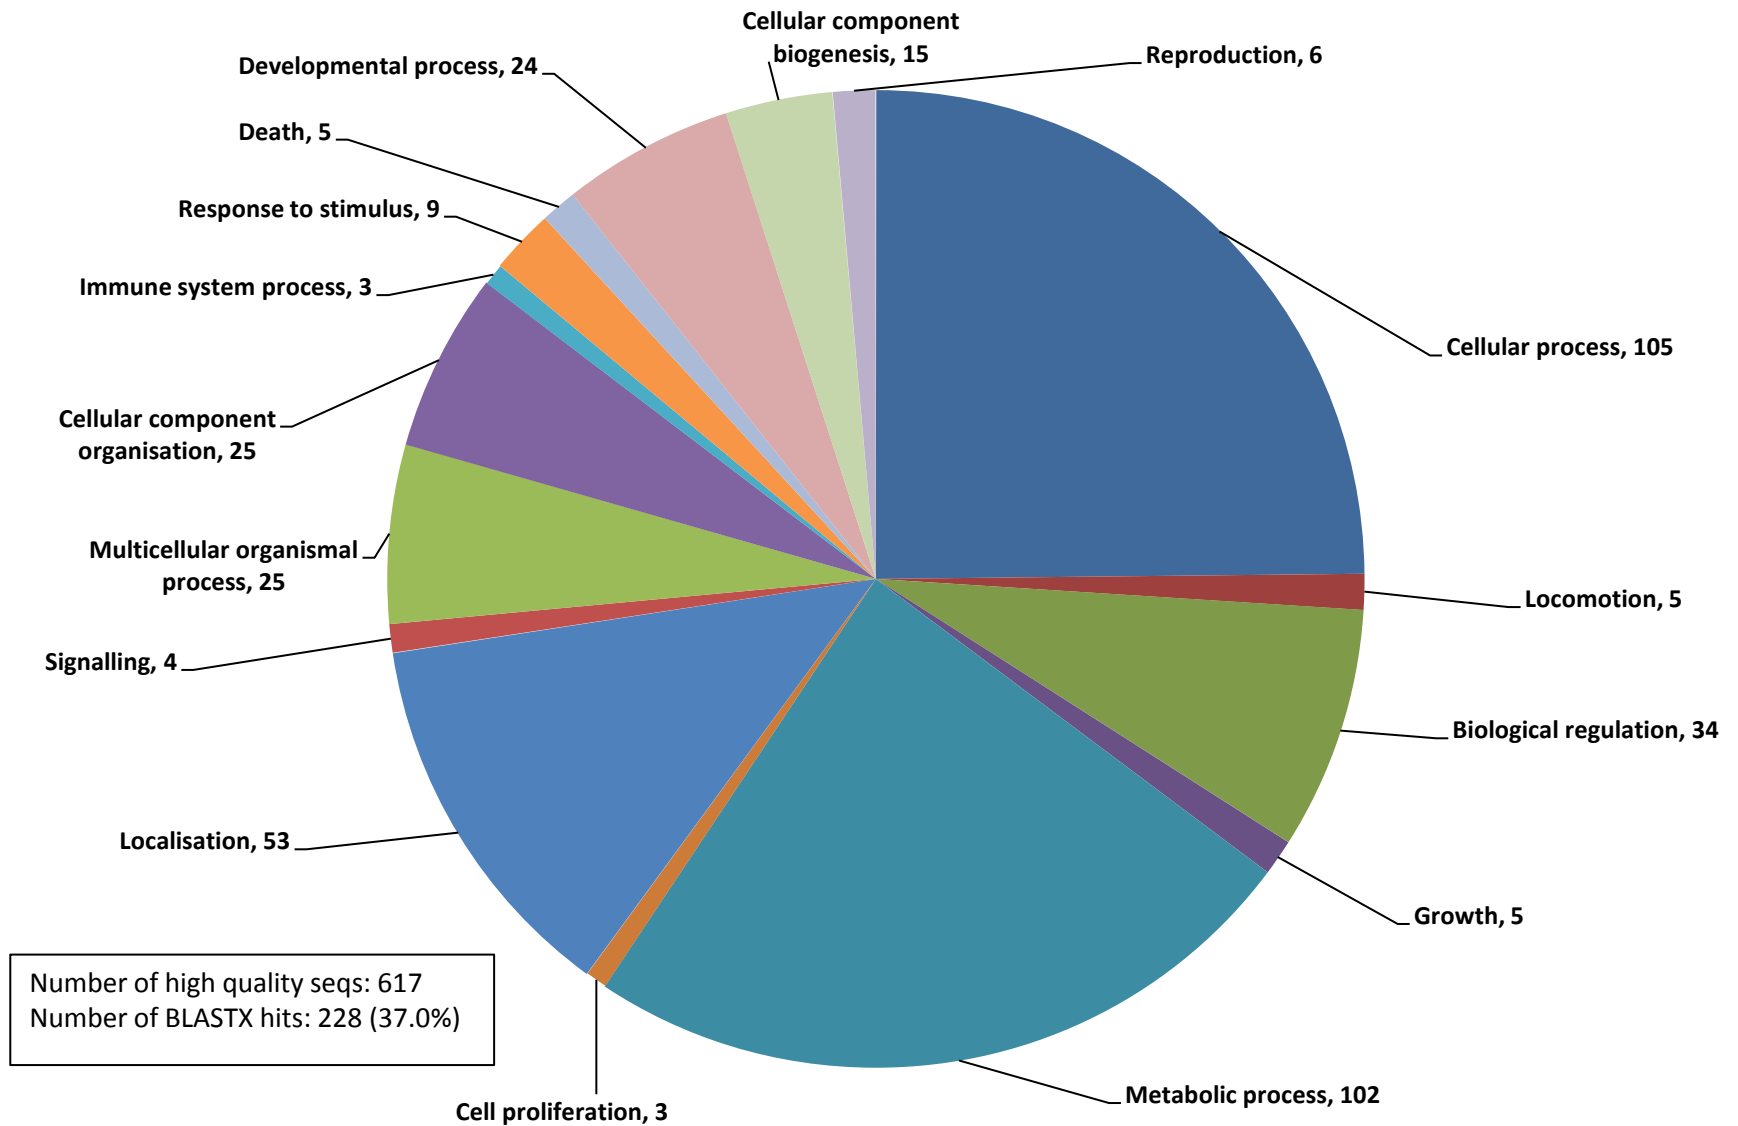

Supplement: Supplementary file [file 27609242]
